# Supplementary material for: Toll interacting protein (TOLLIP) increases in fibrotic lung tissue of connective tissue disease-associated interstitial lung disease and is associated with clinical outcome
Source: Research Square preprint supplement (doi:10.21203/rs.3.rs-1403778/v1), 2022-03-14
Supplement: Supplementary file 1 [file 45296e4c1b7798f7901c0f83.docx]

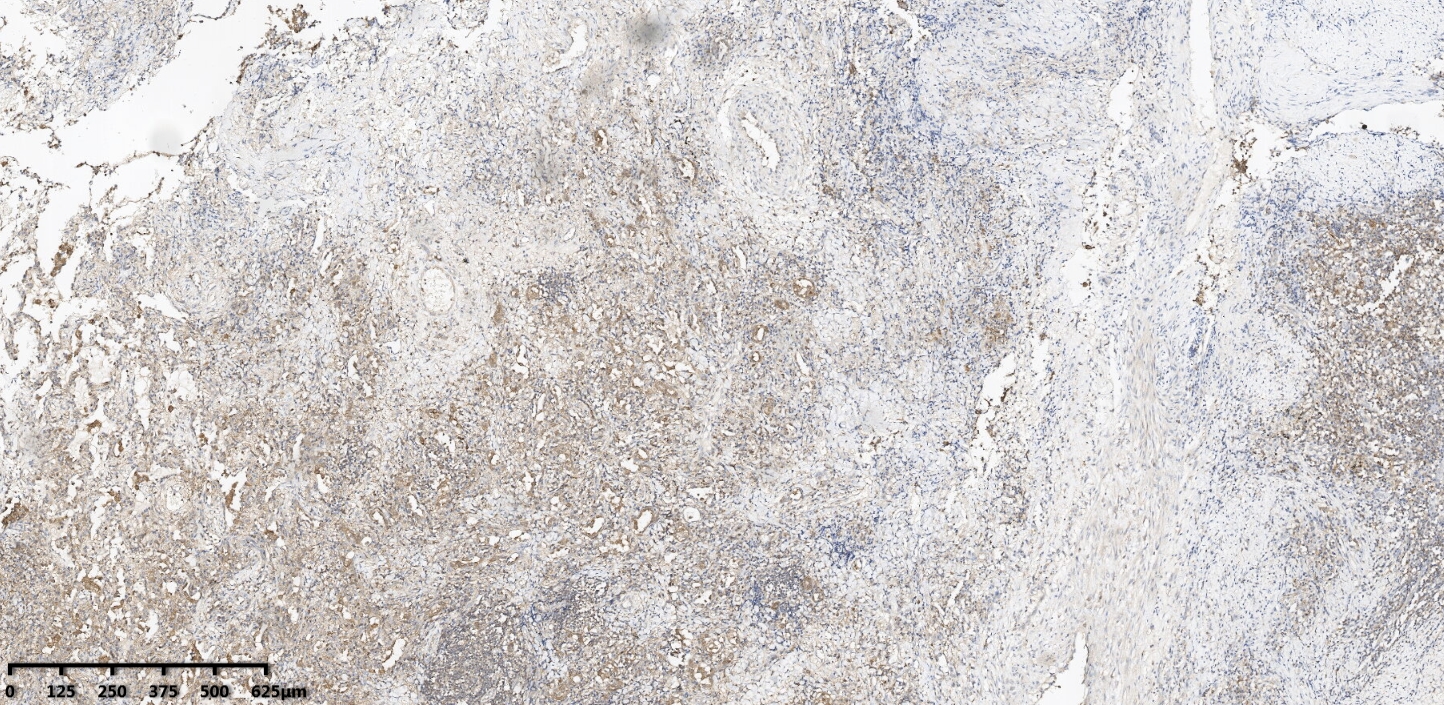


TOLLIP expression of lung specimens of the subjects at 1:800 dilution x40


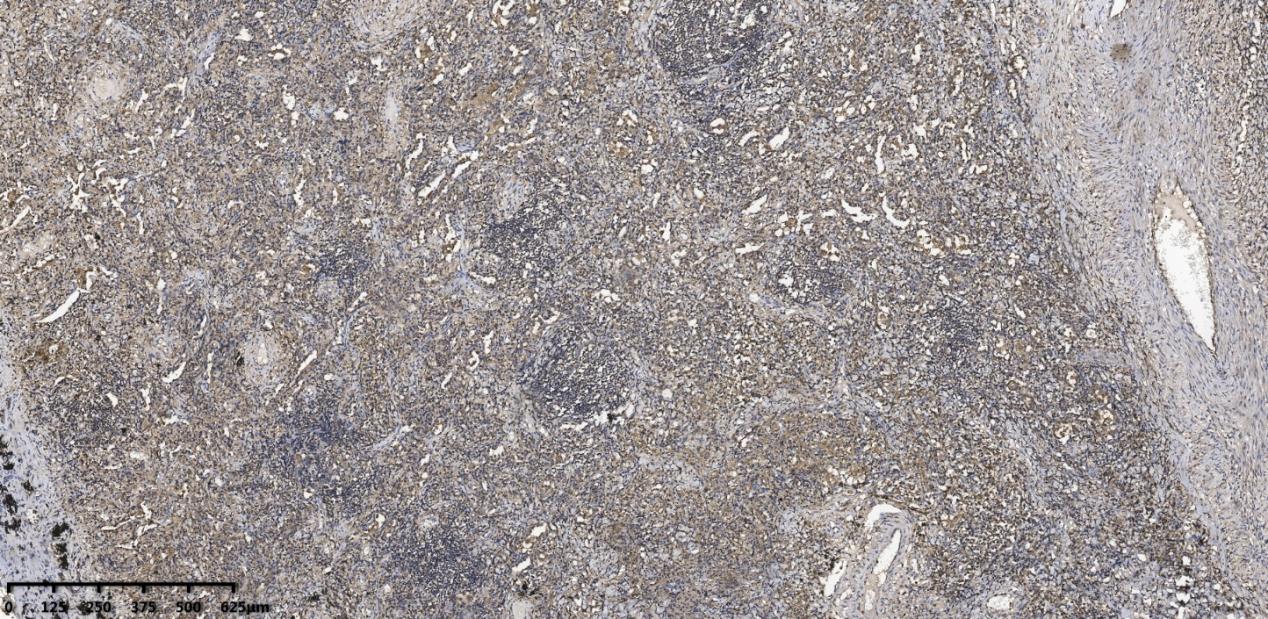


TOLLIP expression of lung specimens of the subjects at 1:400 dilution x40
